# Supplementary material
Source: Frontiers journal article supplement (https://www.frontiersin.org/articles/436879)
Supplement: Data_Sheet_1.PDF [file Data_Sheet_1.PDF]

**Supplementary Table 1. The list of antibodies and pigments used in this study.**

| Antibody or pigment                                                      | Clone      | Dilution to use | Catalog number | Supplier                             |
|--------------------------------------------------------------------------|------------|-----------------|----------------|--------------------------------------|
| LEAF purified anti-mouse CD3 $\epsilon$ Antibody                         | 145-2C11   | -               | 100314         | BioLegend                            |
| LEAF purified anti-mouse CD28 Antibody                                   | 37.51      | -               | 102111         | BioLegend                            |
| Purified anti-mouse CD16/32 Antibody                                     | 93         | $\times 200$    | 101302         | BioLegend                            |
| Purified anti-mouse CD107a Antibody                                      | 1D4B       | $\times 200$    | 121601         | BioLegend                            |
| Anti-Nitrotyrosine (rabbit immunoaffinity purified IgG)                  | Polyclonal | $\times 200$    | 06-284         | Merck                                |
| Biotin anti-mouse Ly-6G/Ly-6C (Gr-1) Antibody                            | RB6-8C5    | $\times 200$    | 108403         | BioLegend                            |
| Biotin anti-mouse F4/80 Antibody                                         | BM8        | $\times 200$    | 123105         | BioLegend                            |
| Donkey anti-Rat IgG (H+L) Secondary Antibody, PE                         | polyclonal | $\times 200$    | 12-4822-82     | eBioscience (Thermo Fisher Sciences) |
| F(ab') <sub>2</sub> -Donkey anti-Rabbit IgG (H+L) Secondary Antibody, PE | polyclonal | $\times 200$    | 12-4739-81     | eBioscience (Thermo Fisher Sciences) |
| Streptavidin-PE/Cy7                                                      | -          | $\times 200$    | 405206         | BioLegend                            |
| FITC anti-mouse F4/80 Antibody                                           | BM8        | $\times 200$    | 123107         | BioLegend                            |
| FITC anti-mouse IFN- $\gamma$ Antibody                                   | XMG1.2     | $\times 200$    | 505806         | BioLegend                            |
| PE anti-mouse CD8a Antibody                                              | 53-6.7     | $\times 200$    | 100707         | BioLegend                            |
| Anti-Mouse CD62L Antibody PE                                             | MEL-14     | $\times 200$    | 12-0621-81     | eBioscience (Thermo Fisher Sciences) |
| Anti-Mouse CD115(c-fms) Antibody PE                                      | AFS98      | $\times 200$    | 12-1152-81     | eBioscience (Thermo Fisher Sciences) |
| FITC anti-mouse CD206 (MMR) Antibody                                     | C068C2     | $\times 200$    | 141703         | BioLegend                            |
| PE anti-mouse CD223 (LAG-3) Antibody                                     | C9B7W      | $\times 200$    | 125207         | BioLegend                            |
| Anti-Mouse CD274 (B7-H1) Antibody PE                                     | MIH5       | $\times 200$    | 12-5982-81     | eBioscience (Thermo Fisher Sciences) |
| PE anti-mouse CD279 (PD-1) Antibody                                      | RMP1-30    | $\times 200$    | 109103         | BioLegend                            |
| PE anti-mouse F4/80 Antibody                                             | BM8        | $\times 200$    | 123109         | BioLegend                            |
| Anti-Mouse NOS2 Antibody PE                                              | CXNFT      | $\times 200$    | 12-5920-80     | eBioscience (Thermo Fisher Sciences) |
| T-select H-2Kb OVA Tetramer-SIINFEKL-PE                                  | -          | $\times 50$     | TS-5001-1C     | MBL                                  |
| PE/Cy7 anti-mouse CD3 Antibody                                           | 17A2       | $\times 200$    | 100219         | BioLegend                            |
| PE/Cy7 anti-mouse/human CD11b Antibody                                   | M1/70      | $\times 200$    | 101215         | BioLegend                            |
| PE/Cy7 anti-mouse CD366 (Tim-3) Antibody                                 | B8.2C12    | $\times 200$    | 134009         | BioLegend                            |
| APC/Cy7 anti-mouse CD45 Antibody                                         | 30-F11     | $\times 200$    | 103116         | BioLegend                            |
| APC anti-mouse CD3 $\epsilon$ Antibody                                   | 145-2C11   | $\times 200$    | 100311         | BioLegend                            |
| APC anti-mouse CD11c Antibody                                            | N418       | $\times 200$    | 117310         | BioLegend                            |
| APC anti-mouse/human CD44 Antibody                                       | IM7        | $\times 200$    | 103012         | BioLegend                            |
| APC anti-mouse Ly-6G/Ly-6C (Gr-1) Antibody                               | RB6-8C5    | $\times 200$    | 108411         | BioLegend                            |
| Alexa Fluor 700 anti-mouse CD3 Antibody                                  | 17A2       | $\times 200$    | 100216         | BioLegend                            |
| Alexa Fluor 700 anti-mouse CD8a Antibody                                 | 53-6.7     | $\times 200$    | 100730         | BioLegend                            |
| BD Via-Probe Cell Viability Solution                                     | -          | $\times 50$     | 555816         | BD Biosciences                       |

**Supplementary Table 2. The list of primer sequences for qPCR used in this study.**

| Gene           | Forward primer sequence (5'-3') | Reverse primer sequence (5'-3') |
|----------------|---------------------------------|---------------------------------|
| <i>Arg1</i>    | GGAATCTGCATGGGCAACCTGTGT        | AGGGTCTACGTCTCGCAAGCCA          |
| <i>Csf1</i>    | CCAAGGAGGTGTCAGAACTGT           | AAAGGCAATCTGGCATGAAGTC          |
| <i>Csf3</i>    | GAGCAGTTGTGTGCCACCTACA          | AGCTGGCTTAGGCACTGTGTCT          |
| <i>Ccl2</i>    | AGGTGTCCCAAAGAAGCTGTAGTT        | ACAGACCTCTCTCTTGAGCTTGGT        |
| <i>Cxcl1</i>   | TGAGCTGCGCTGTCAAGTGCCT          | AGAAGCCAGCGTTCACCAGA            |
| <i>Cxcl2</i>   | GTTAGCCTTGCCCTTTGTTCAAGTATC     | GAGCTTGAGTGTGACGCCCCCAGG        |
| <i>Cxcl12</i>  | CAGAGCCAACGTCAAGCA              | AGGTACTCTTGATCCAC               |
| <i>Fas1</i>    | TTAAATGGGCCACACTCCTC            | ACTCCGTGAGTTCACCAACC            |
| <i>Gapdh</i>   | GCCTGGAGAAACCTGCCA              | CCCTCAGATGCCTGCTTCA             |
| <i>Ifnb</i>    | CCAGCTCCAAGAAAGGACGA            | CGCCCTGTAGGTGAGGTTGAT           |
| <i>Il12a</i>   | TGTGTCTCCCAAGGTCAGC             | ATGACCCTGGCCAAACTGAG            |
| <i>Il34</i>    | ACTCAGAGTGGCCAACATCACAAG        | ATTGAGACTACCAAGACCCACAG         |
| <i>Tgfb1</i>   | GCTGAACCAAGGAGACGGAAT           | CAAGAGCAGTGAGCGCTGAA            |
| <i>Tnfsf10</i> | CTTCACCAACGAGATGAAGCAG          | TCCGTCTTTGAGAAGCAAGCTA          |

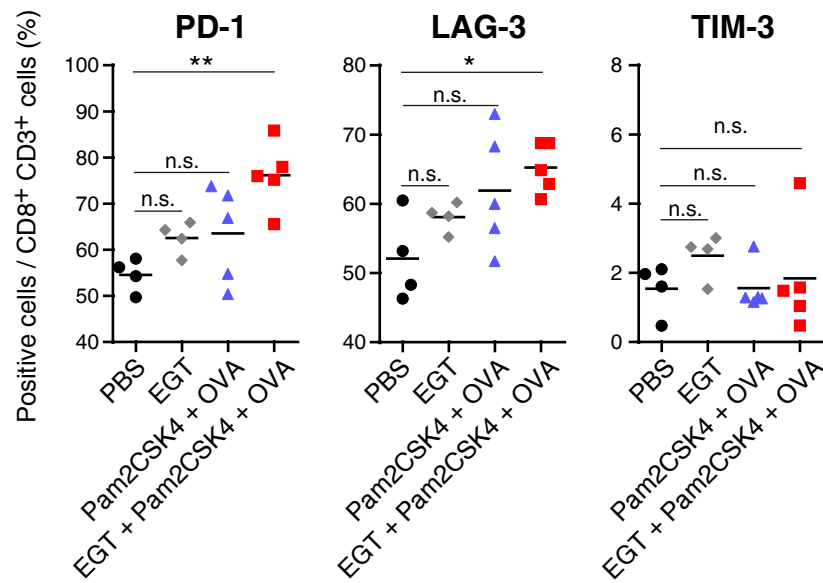

**Supplementary Fig. 1. Expression analysis of exhaustion markers on intratumoral CD8<sup>+</sup> CD3<sup>+</sup> cells.** LLC-OVA-implanted WT B6 mice were treated as per Fig. 1A and tumors were harvested at day 18. Cell surface expression levels of indicated proteins on CD8<sup>+</sup> CD3<sup>+</sup> cells were analyzed by flow cytometry. n = 4-5 mice per group. \*P < 0.05, \*\*P < 0.01. n.s., not significant.

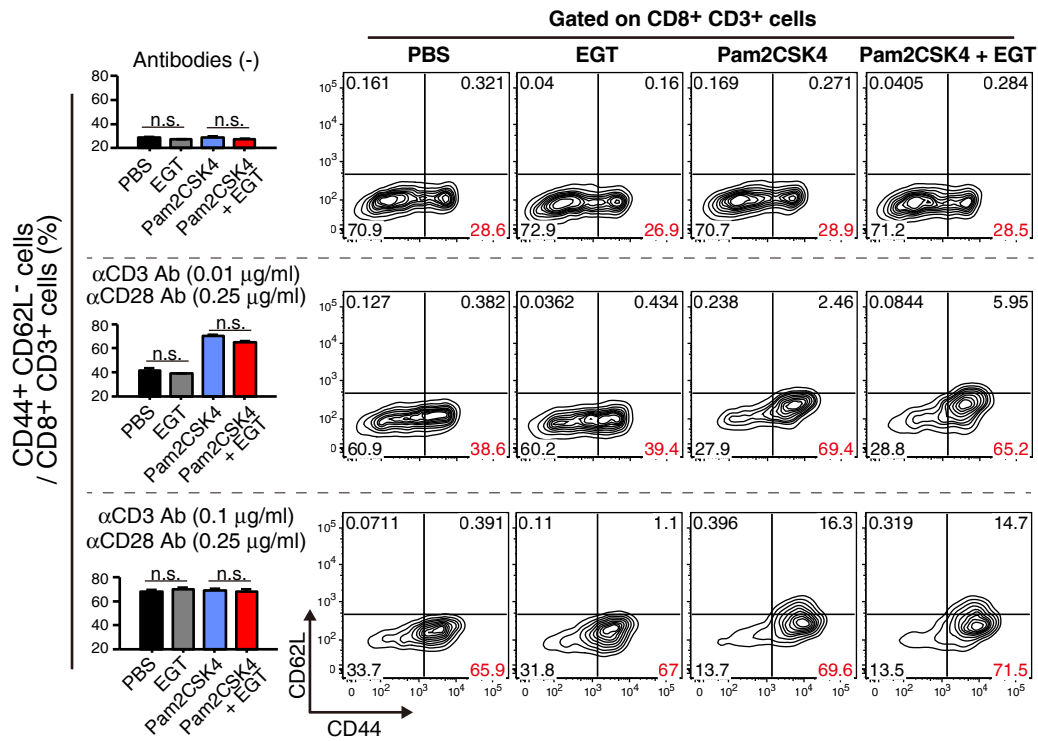

**Supplementary Fig. 2. EGT does not induce direct activation of CTLs.** CD8<sup>+</sup> splenocytes ( $1 \times 10^5$  cells/well in U-bottom plate) isolated from tumor-free mice were incubated with or without EGT for 24 h, and then, stimulation was performed with indicated concentration of αCD3 and αCD28 Abs. CD44<sup>+</sup> CD62L<sup>-</sup> cells were counted by flow cytometry 60 h after stimulation. Representative FACS plot and summary graph are shown.  $n = 3$ .

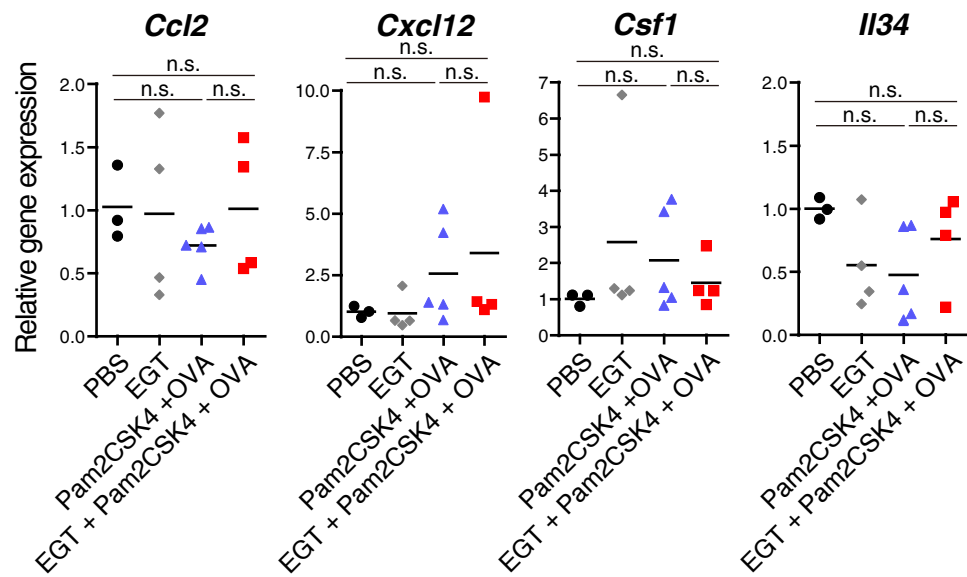

**Supplementary Fig. 3. Analysis on RNA expression related to tumor-infiltration or expansion of TAMs.** LLC-OVA-implanted WT B6 mice were treated as per Fig. 1A and tumors were harvested at day 18. Then, RNA expression levels of total tumor cells were determined. n = 3-5 mice per group. \*P < 0.05. n.s., not significant.

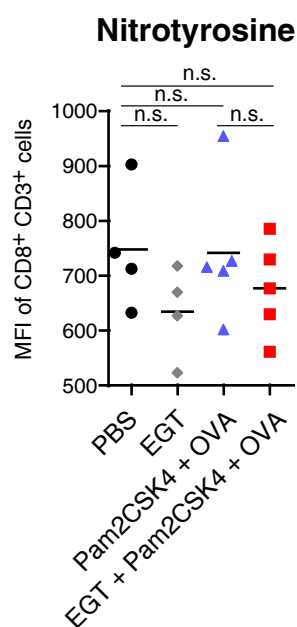

**Supplementary Fig. 4. EGT-induced iNOS up-regulation in TAMs is not related to CTL nitraion in tumor.** LLC-OVA-implanted WT B6 mice were treated as per Fig. 1A and tumors were harvested at day 18. Total tumor suspension was fix and permeabilized, and then, reacted with anti-nitrotyrosine Ab and PE-conjugated secondary Ab. Mean fluorecent intensity (MFI) of nitrotyrosine was measured by flow cytometry. n = 4-5 mice per group. n.s., not significant.

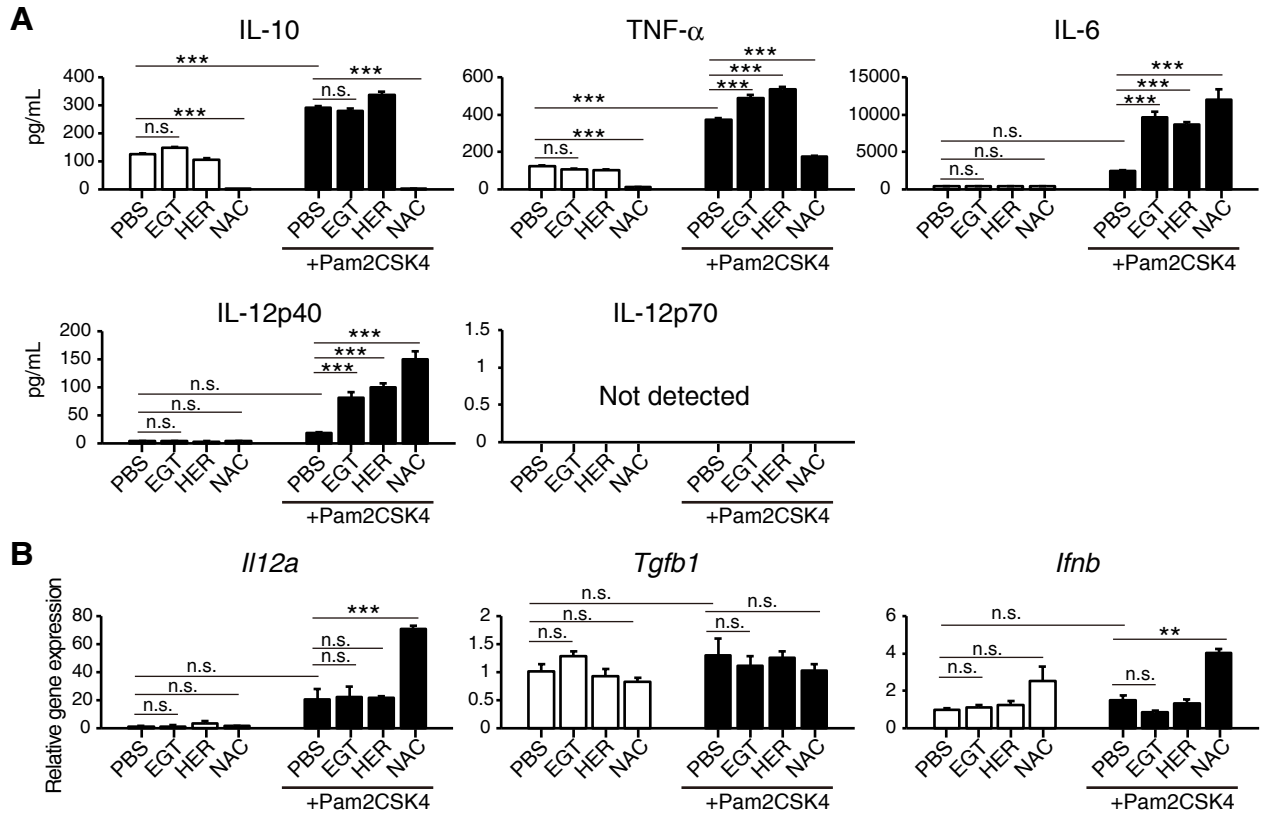

**Supplementary Fig. 5. Changes of TAM cytokine production induced by EGT, HER or NAC under TLR2 stimulation.** (A,B) Magnetically sorted intratumoral F4/80<sup>+</sup> cells were treated with or without 10 mM of EGT, HER or NAC for 24h, and then, 50 nM of Pam2CSK4 was added. (A) Culture supernatant was collected 24 h after Pam2CSK4 stimulation. Concentration of cytokines was determined using CBA or enzyme-linked immunosorbent assay (ELISA). ELISA (kits were purchased by BioLegend) was used for quantification of IL-12p40 or IL-12p70, and CBA was conducted to determine other cytokines.  $n = 3$ . (B) Total RNA isolated 4 h after Pam2CSK4 stimulation was served to reverse-transcription and qPCR steps. RNA expression normalized to GAPDH was indicated.  $n = 3$ . Data are shown as average  $\pm$  SEM. \* $P < 0.05$ , \*\* $P < 0.01$ , \*\*\* $P < 0.001$ . n.s., not significant.

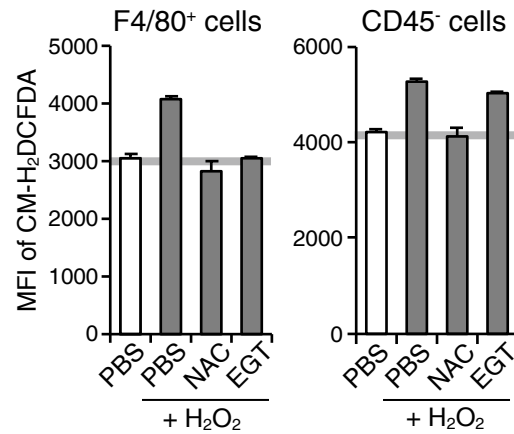

**Supplementary Fig. 6. Differential ROS clearance pattern between EGT and NAC in F4/80<sup>+</sup> and CD45<sup>-</sup> cells.** LLC-OVA bearing mice were i.p injected with PBS, EGT (500  $\mu$ g) or NAC (350  $\mu$ g) twice with 24 h interval. Tumors were harvested 2 h after last injection. Single cell suspension was exposed to 1 mM H<sub>2</sub>O<sub>2</sub> for 30 min, and then, cells were treated with ROS indicator CM-H<sub>2</sub>DCFDA (Thermo fisher scientific). After 20 min incubation in 37°C and 5% CO<sub>2</sub> conditions, cell surface markers were stained by fluorescent Abs and analyzed by flowcytometry. Tumors were pooled from 2 mice per group and data were obtained with duplication (n=2). NAC decreased ROS in both F4/80<sup>+</sup> and CD45<sup>-</sup> cells. However, EGT cleared ROS in F4/80<sup>+</sup> cells but not CD45<sup>-</sup> cells.
